# Supplementary material for: Roles of NlAKTIP in the Growth and Eclosion of the Rice Brown Planthopper, Nilaparvata lugens Stål, as Revealed by RNA Interference
Source: PubMed Central journal article supplement (PMC4613341; doi:10.3390/ijms160922888), 2015-09-22
Supplement: ijms-16-22888-s001.pdf [file ijms-16-22888-s001.pdf]

## Supplementary Information

```

1      acatgggagacaataacacataaacctcaaaaaatcaatatgaagctcaaaataagtattaactaatttgtttactact
79     atctttaaaaacttcgttacaataataaaaaatattcatagcttggagtatctagaaaaatcttagcaataagaga
157    gtttgtagaatttgaggtaatcaatcaagtaaactgtgtcATGGCTTCAGGTAGTTTCAAAAAGGGTCTGAGGCAAC
1      M A S G S F K K G S E A T
235    AGAGACAAATGAACCTTTCAAACGGCAAGGCTCATTGCGAAAAGTTCTTCCTCCTAAACAATATGGAGAATCAATGCT
14     E T N E P F K R Q G S L R K V L P P K Q Y G E S M L
313    TAGCATGTCTGCCAAAATGATCGAACGTCCACAACAATCTTCTTCGCAACAAGTCTTTACAAGCAAGCTTACAGTCC
40     S M S A K M I E R P Q Q S S S Q T S L Y K Q A Y S P
391    ATTCTTCCAAGAGTATAGTATAATGAGTGAATACAACCTACTGACTAAGAAATGTCTTCCAGGGCTCTATGTTATGCC
66     F F Q E Y S I M S E Y N L L T K K C L P G L Y V M P
469    CTCGCTTCTTCTCCTTTATTATGGTTTGGTGTATTGTTTCATCAAAAAAGGGCTCTATCATGGAGGTATCTTTCGTTT
92     S A S S P L L W F G V L F I K K G L Y H G G I F R F
547    CAATTTGGAAACTCCCGAGACCTTTCCTGATTGCACATGTCCGAAAGTTGTATTTCGAGTCTAAAGTCTTCCATCCTAG
118    N L E T P E T F P D C T C P K V V F E S K V F H P S
625    TATAGACATTGCAACTGGCGAAGTTTTCTTGAATCAAACATTTCCGGAGTGGAAAGAAAGACGTGAACCATTTATGGCA
144    I D I A T G E V F L N Q T F P E W K K D V N H L W Q
703    AATACTTGAACACGTATTGCAGTTGTTTCTCAGCATTGACGTCAAGGATGCAGTCAACCAAGAAGCATCTATCTCTAT
170    I L E H V L Q L F L S I D V K D A V N Q E A S I S M
781    GTGAacgataatggatgccttcgtcaaccgagtgaaagagagtgtagactcttcacagaataattgttcgacgaaccg
196    *
859    acgtcaagtgatcctactatctccgattcaatcaatatgatgaaaccctccataagacagcaagagaagctttaaagt
937    cgaaaaaaaaaaaaaaaaaaaaaaaaaaaaa

```

**Figure S1.** The nucleotide and deduced amino acid sequences of *NIKTIP*. The deduced amino acid sequence is shown below the cDNA sequence. The start and stop codons are shown in boldface, and an asterisk represents the position of the stop codons.

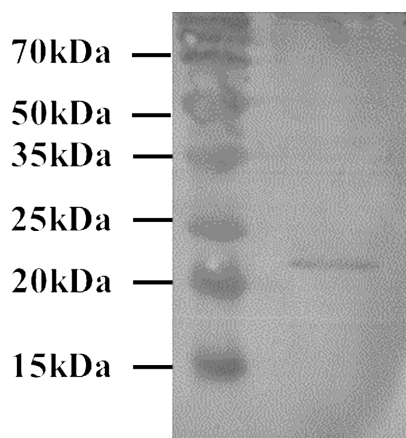

**Figure S2.** Test of the AKTIP antibody specificity. The polyclonal rabbit antibody is generated by PolyExpress™ Antibody Service.

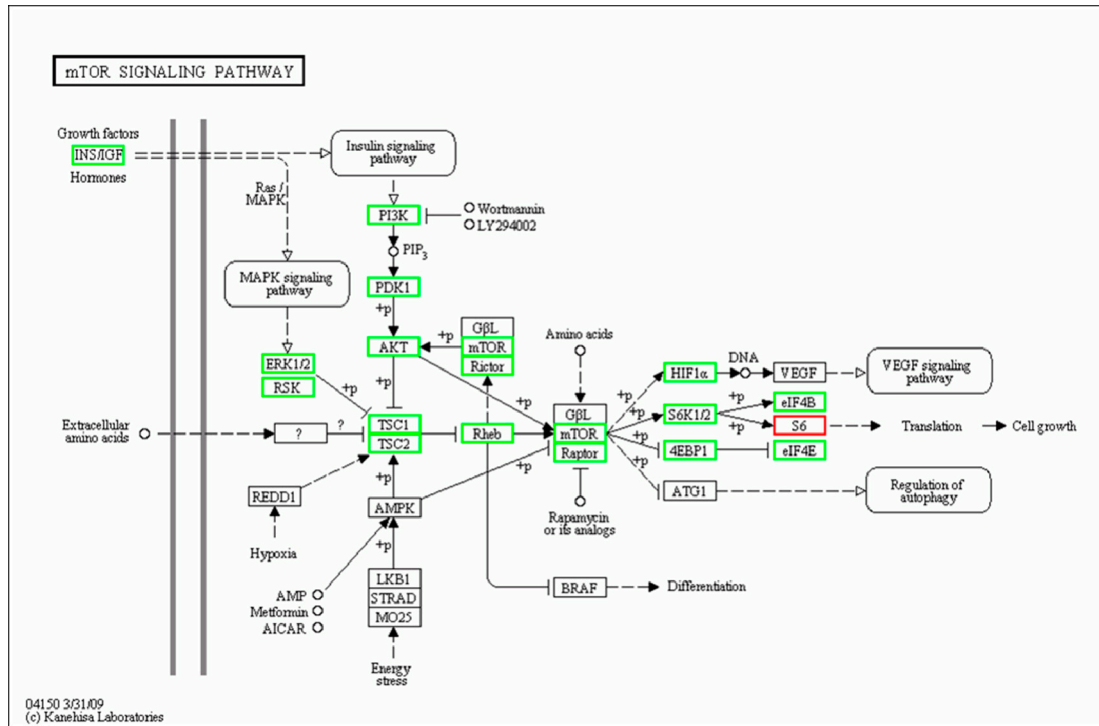

**Figure S3.** Gene expression profile of the insulin/AKT/mTOR signaling pathway in BPH. Boxes highlighted in green correspond to down-regulated genes, while the red box indicates up-regulated genes in the Rh colony compared with the Tn colony. Solid line and black arrows represent for directly stimulatory modification; Dotted line with black arrow represent for indirectly stimulatory modification; Dotted line with white arrow represent for translocation.
